# Supplementary material for: Identification of Phenological Growth Stages of Four Morus Species Based on the Extended BBCH-Scale and Its Application in Fruit Development with Morphological Profiles and Color Characteristics
Source: MDPI journal article supplement (doi:10.3390/horticulturae8121140), 2022-12-03
Supplement: s1 [file s1]

**Table S1** Time of bud breaking in six mulberry cultivars and estimation of their bud chilling requirement by Utah model in Wuhan

| Accession name | Bud development<br>(02: Buds elongating and burst) |      | Chilling<br>requirement (CUs) |
|----------------|----------------------------------------------------|------|-------------------------------|
|                | 2021                                               | 2022 |                               |
| <b>ZJ</b>      | 1/26                                               | 1/24 | 1156                          |
| <b>ZZB</b>     | 2/18                                               | 3/5  | 1645.25                       |
| <b>XJ-BS</b>   | 2/20                                               | 3/5  | 1645.25                       |
| <b>TW-CGS</b>  | 2/13                                               | 2/8  | 1440                          |
| <b>XF-CSS</b>  | 3/24                                               | 3/22 | 1865.5                        |
| <b>CS-XZ</b>   | 3/17                                               | 3/17 | 1789.75                       |

**Table S2** Primary phenological growth stages for six mulberry cultivars in different provinces

| Accession<br>name | Flowering stage<br>(65: Full flowering) |                        |                      |                     | Fruit maturity period<br>(87: Fruit ripe for picking ) |                        |                      |                     |
|-------------------|-----------------------------------------|------------------------|----------------------|---------------------|--------------------------------------------------------|------------------------|----------------------|---------------------|
|                   | Shiyan,<br>Hubei                        | Wuhan,<br>Hubei        | Nanchong,<br>Sichuan | Nanning,<br>Guangxi | Shiyan,<br>Hubei                                       | Wuhan,<br>Hubei        | Nanchong,<br>Sichuan | Nanning,<br>Guangxi |
| <b>ZJ</b>         | 2022/3/24                               | 2021/3/14<br>2022/3/15 |                      |                     | 2022/5/6                                               | 2021/4/25<br>2022/4/28 |                      |                     |
| <b>ZZB</b>        | 2022/4/6                                | 2021/3/22<br>2022/3/24 | 2022/3/26            | 2022/2/16           | 2022/5/15                                              | 2021/4/28<br>2022/4/29 | 2022/4/26            | 2022/4/15           |
| <b>XJ-BS</b>      |                                         | 2021/3/25<br>2022/3/27 |                      |                     |                                                        | 2021/5/2<br>2022/5/1   |                      |                     |
| <b>TW-CGS</b>     | 2022/3/24                               | 2021/3/15<br>2022/3/14 | 2022/3/23            | 2022/2/4            | 2022/4/29                                              | 2021/4/24<br>2022/4/22 | 2022/4/22            | 2022/4/5            |
| <b>XF-CSS</b>     |                                         | 2021/4/15<br>2022/4/10 |                      |                     |                                                        | 2021/5/22<br>2022/5/17 |                      |                     |
| <b>CS-XZ</b>      |                                         | 2021/4/13<br>2022/4/7  |                      |                     |                                                        |                        |                      |                     |

Note: Shiyan, 110.803566E, 32.642568N; Wuhan, 114.334946E, 30.488076N; Nanning, 108.235117E, 22.848434N; Nanchong, 106.096713E, 30.798116N.

**Table S3** The phenological data of stage 0-9 for six mulberry cultivars

| BBCH code                                                             |    | ZJ         | TW-CGS     | ZZB        | XJ-BS      | CS-XZ      | XF-CSS     |
|-----------------------------------------------------------------------|----|------------|------------|------------|------------|------------|------------|
| Principal growth stage 0: bud development                             | 01 | 2021/1/25  | 2021/2/12  | 2021/2/17  | 2021/2/19  | 2021/2/16  | 2021/3/23  |
|                                                                       | 02 | 2021/1/26  | 2021/2/13  | 2021/2/18  | 2021/2/20  | 2021/3/17  | 2021/3/24  |
|                                                                       | 03 | 2021/2/16  | 2021/2/19  | 2021/2/23  | 2021/3/4   | 2021/3/22  | 2021/3/29  |
|                                                                       | 07 | 2021/2/17  | 2021/2/20  | 2021/2/24  | 2021/3/7   | 2021/3/24  | 2021/4/1   |
|                                                                       | 09 | 2021/2/18  | 2021/2/21  | 2021/3/4   | 2021/3/9   | 2021/3/26  | 2021/4/2   |
| Principal growth stage 1: leaf development                            | 10 | 2021/2/19  | 2021/2/22  | 2021/3/5   | 2021/3/10  | 2021/3/27  | 2021/4/2   |
|                                                                       | 11 | 2021/2/20  | 2021/2/23  | 2021/3/9   | 2021/3/14  | 2021/4/1   | 2021/4/4   |
|                                                                       | 15 | 2021/2/24  | 2021/2/24  | 2021/3/12  | 2021/3/17  | 2021/4/5   | 2021/4/8   |
|                                                                       | 17 | 2021/2/26  | 2021/2/27  | 2021/3/14  | 2021/3/20  | 2021/4/7   | 2021/4/12  |
|                                                                       | 19 | 2021/3/2   | 2021/3/9   | 2021/3/17  | 2021/3/22  | 2021/4/8   | 2021/4/13  |
| Principal growth stage 3: shoot development                           | 31 | 2021/2/21  | 2021/3/5   | 2021/3/14  | 2021/3/17  | 2021/3/30  | 2021/4/10  |
|                                                                       | 33 | 2021/4/14  | 2021/4/25  | 2021/4/14  | 2021/4/14  | 2021/4/10  | 2021/4/24  |
|                                                                       | 34 | 2021/5/2   | 2021/5/18  | 2021/5/4   | 2021/5/7   | 2021/4/24  | 2021/5/7   |
|                                                                       | 35 | 2021/5/18  | 2021/6/18  | 2021/5/20  | 2021/5/22  | 2021/5/9   | 2021/5/12  |
| Principal growth stage 5: inflorescence development                   | 51 | 2021/2/20  | 2021/3/5   | 2021/3/4   | 2021/3/14  | 2021/3/28  | 2021/4/4   |
|                                                                       | 53 | 2021/2/26  | 2021/3/9   | 2021/3/9   | 2021/3/17  | 2021/3/31  | 2021/4/6   |
|                                                                       | 55 | 2021/3/1   | 2021/3/11  | 2021/3/12  | 2021/3/20  | 2021/4/4   | 2021/4/9   |
|                                                                       | 57 | 2021/3/2   | 2021/3/12  | 2021/3/13  | 2021/3/22  | 2021/4/6   | 2021/4/10  |
|                                                                       | 59 | 2021/3/4   | 2021/3/14  | 2021/3/14  | 2021/3/24  | 2021/4/8   | 2021/4/12  |
| Principal growth stage 6: flowering                                   | 61 | 2021/3/9   | 2021/3/11  | 2021/3/13  | 2021/3/21  | 2021/4/8   | 2021/4/11  |
|                                                                       | 63 | 2021/3/12  | 2021/3/12  | 2021/3/20  | 2021/3/23  | 2021/4/10  | 2021/4/13  |
|                                                                       | 65 | 2021/3/14  | 2021/3/15  | 2021/3/22  | 2021/3/25  | 2021/4/13  | 2021/4/15  |
|                                                                       | 67 | 2021/3/17  | 2021/18    | 2021/3/25  | 2021/3/29  | 2021/4/15  | 2021/4/18  |
|                                                                       | 69 | 2021/3/21  | 2021/3/22  | 2021/3/29  | 2021/4/4   | 2021/4/18  | 2021/4/22  |
| Principal growth stage 7: fruit development                           | 72 | 2021/3/26  | 2021/3/29  | 2021/4/1   | 2021/4/7   |            | 2021/4/24  |
|                                                                       | 73 | 2021/4/1   | 2021/4/16  | 2021/4/13  | 2021/4/20  |            | 2021/4/28  |
|                                                                       | 75 | 2021/4/19  | 2021/4/21  | 2021/4/26  | 2021/4/24  |            | 2021/5/7   |
|                                                                       | 76 | 2021/4/21  | 2021/4/23  | 2021/4/30  | 2021/26    |            | 2021/5/12  |
|                                                                       | 77 | 2021/4/25  | 2021/4/24  | 2021/5/1   | 2021/5/2   |            | 2021/5/22  |
|                                                                       | 79 | 2021/4/27  | 2021/4/26  | 2021/5/2   | 2021/5/4   |            | 2021/5/25  |
| Principal growth stage 8: maturity of fruit                           | 81 | 2021/4/14  | 2021/4/16  | 2021/4/22  | 2021/4/24  |            | 2021/5/3   |
|                                                                       | 83 | 2021/4/19  | 2021/4/21  | 2021/4/26  | 2021/4/24  |            | 2021/5/7   |
|                                                                       | 85 | 2021/4/21  | 2021/4/23  | 2021/4/30  | 2021/4/26  |            | 2021/5/12  |
|                                                                       | 87 | 2021/4/25  | 2021/4/24  | 2021/4/28  | 2021/5/2   |            | 2021/5/22  |
| Principal growth stage 9: senescence and beginning of the rest period | 91 | 2021/10/8  | 2021/10/28 | 2021/11/8  | 2021/10/12 | 2021/9/28  | 2021/10/1  |
|                                                                       | 93 | 2021/10/28 | 2021/11/10 | 2021/11/15 | 2021/10/29 | 2021/11/5  | 2021/10/20 |
|                                                                       | 95 | 2021/11/14 | 2021/12/2  | 2021/12/5  | 2021/11/14 | 2021/11/20 | 2021/11/04 |
|                                                                       | 97 | 2022/1/16  | 2022/2/8   | 2022/3/3   | 2022/3/3   | 2022/3/15  | 2022/3/16  |

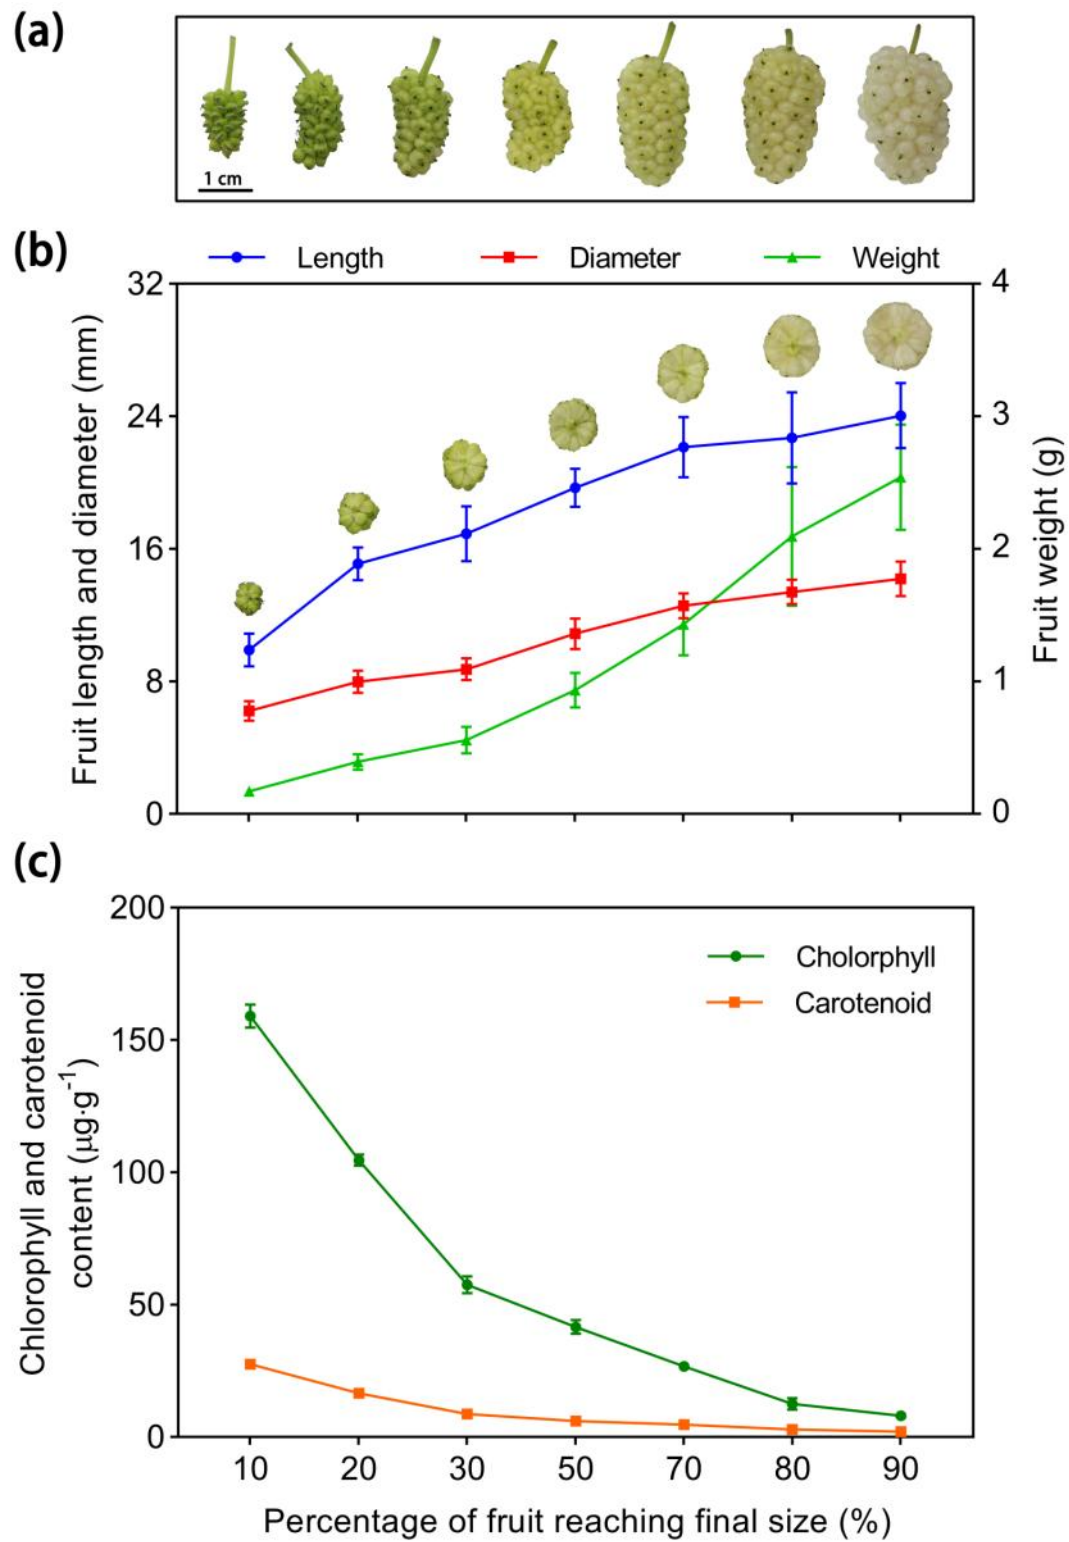

**Figure S1.** Fruit photographs (a), size (b), and pigment content (c) in ‘ZZB’ mulberry at different developmental stages (stages 7 and 8).

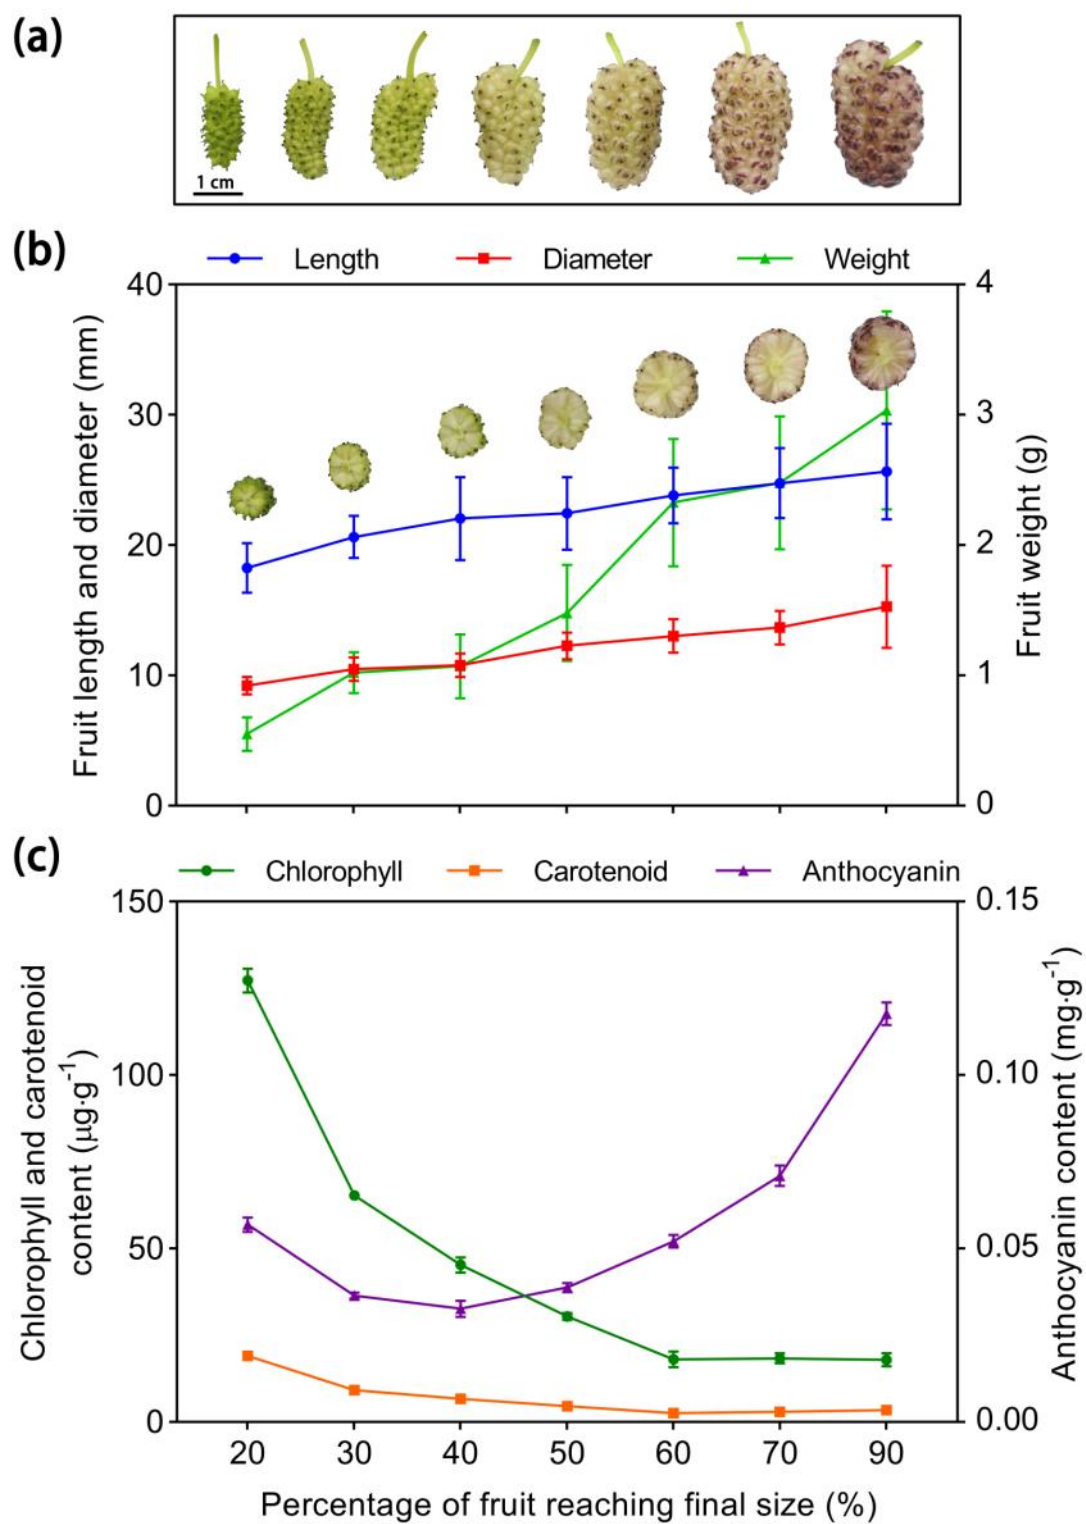

**Figure S2.** Fruit photographs (a), size (b), and pigment content (c) in ‘XJ-BS’ mulberry at different developmental stages (stages 7 and 8).

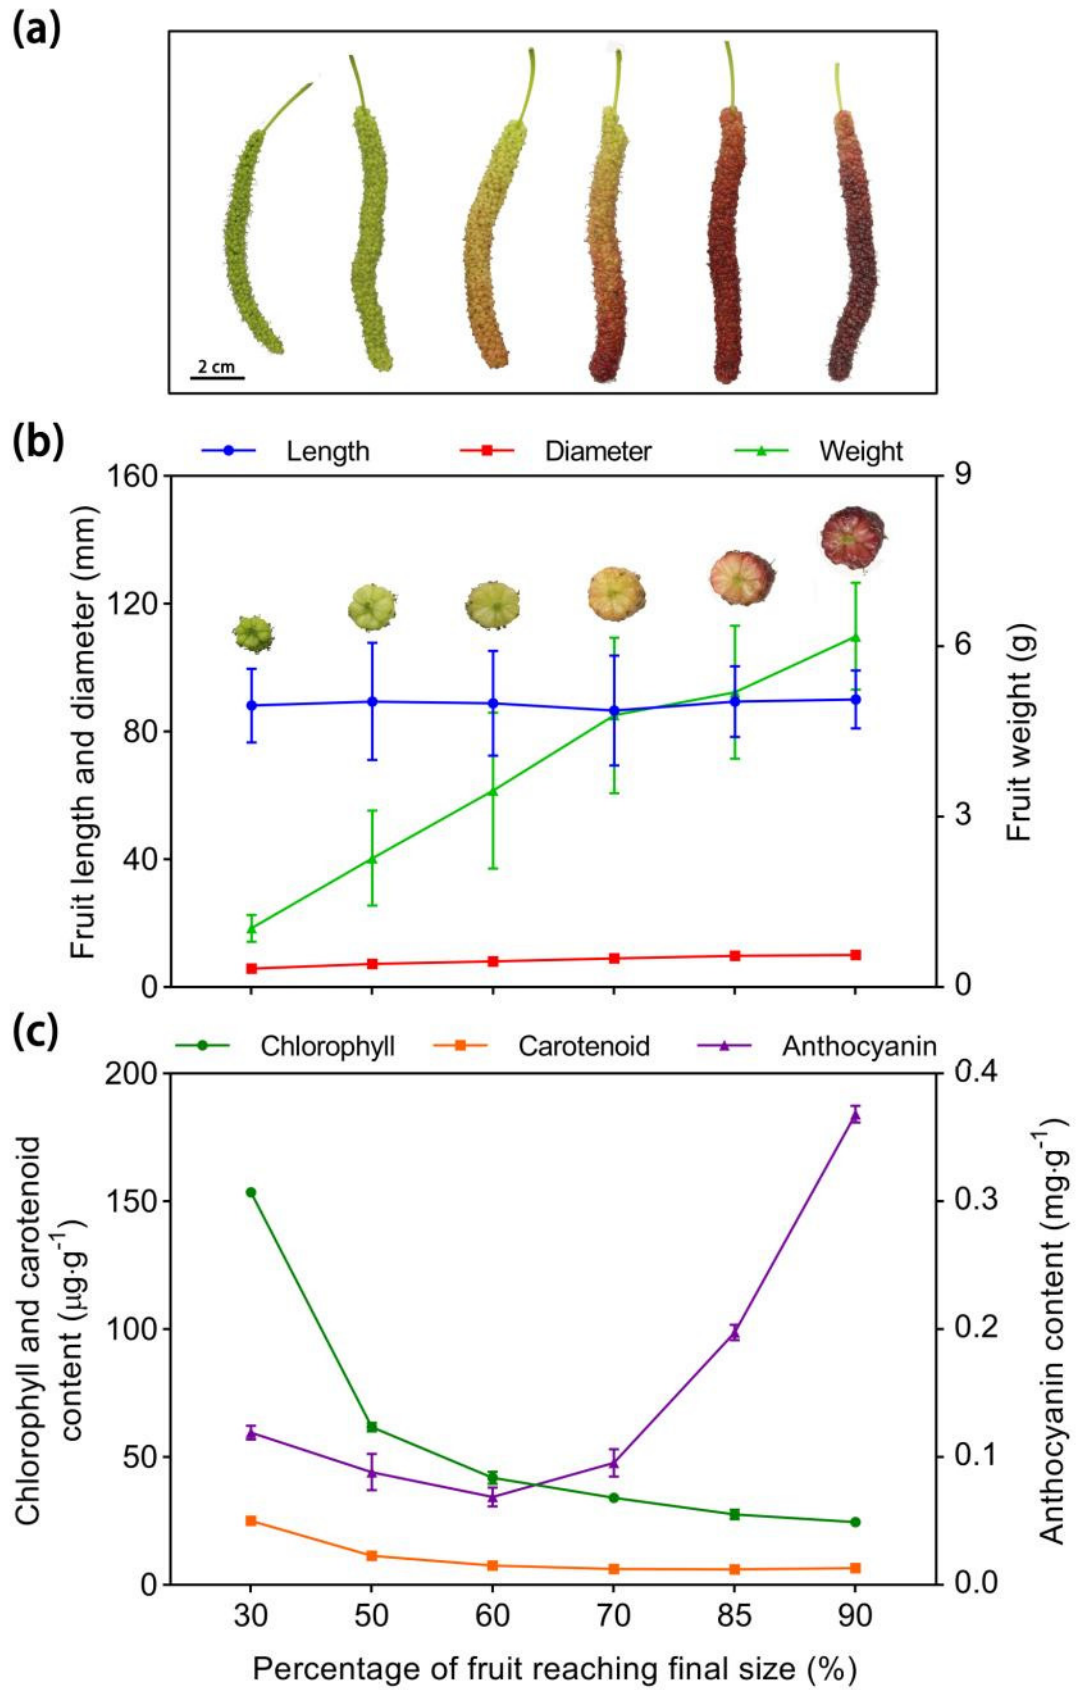

**Figure S3.** Fruit photographs (a), size (b), and pigment content (c) in ‘TW-CGS’ mulberry at different developmental stages (stages 7 and 8).
